# Supplementary material
Source: publisher figshare collection journal article supplement (https://frontiersin.figshare.com/ndownloader/files/14501453)
Supplement: Supplementary file 1 [file 14501453]

**(Appendix) Micromechanics-based homogenization of the effective physical properties  
of composites with an anisotropic matrix and interfacial imperfections**

Seunghwa Ryu<sup>a,\*+</sup>, Sangryun Lee<sup>a+</sup>, Jiyoung Jung<sup>a</sup>, Jinyeop Lee<sup>b</sup>, and Youngsoo Kim<sup>a</sup>

<sup>a</sup>Department of Mechanical Engineering & KI for the NanoCentury, Korea Advanced  
Institute of Science and Technology, Daejeon 34141, Republic of Korea

<sup>b</sup>Department of Mathematical Sciences, Korea Advanced Institute of Science and  
Technology, Daejeon 34141, Republic of Korea

<sup>+</sup>These authors contribute equally to the work.

\*Corresponding author: [ryush@kaist.ac.kr](mailto:ryush@kaist.ac.kr)

## Appendix A: Eshelby tensor (S) for an ellipsoidal shape inclusion in elastostatics for an isotropic medium

For an ellipsoidal inclusion with a symmetric axis ( $x_1$ ) in an isotropic matrix, the Eshelby tensor can be expressed as shown below,

$$\begin{aligned}
 S_{1111} &= \frac{1}{2(1-\nu_0)} \left\{ 1 - 2\nu_0 + \frac{3\rho^2 - 1}{\rho^2 - 1} - \left[ 1 - 2\nu_0 + \frac{3\rho^2}{\rho^2 - 1} \right] g \right\} \\
 S_{2222} &= S_{3333} = \frac{3}{8(1-\nu_0)} \frac{\rho^2}{\rho^2 - 1} + \frac{1}{4(1-\nu_0)} \left[ 1 - 2\nu_0 - \frac{9}{4(\rho^2 - 1)} \right] g \\
 S_{2233} &= S_{3322} = \frac{1}{4(1-\nu_0)} \left\{ \frac{\rho^2}{2(\rho^2 - 1)} - \left[ 1 - 2\nu_0 + \frac{3}{4(\rho^2 - 1)} \right] g \right\} \\
 S_{2211} &= S_{3311} = -\frac{1}{2(1-\nu_0)} \frac{\rho^2}{\rho^2 - 1} + \frac{1}{4(1-\nu_0)} \left\{ \frac{3\rho^2}{\rho^2 - 1} - (1 - 2\nu_0) \right\} g \\
 S_{1122} &= S_{1133} = -\frac{1}{2(1-\nu_0)} \left[ 1 - 2\nu_0 + \frac{1}{\rho^2 - 1} \right] + \frac{1}{2(1-\nu_0)} \left[ 1 - 2\nu_0 + \frac{3}{2(\rho^2 - 1)} \right] g \\
 S_{2323} &= \frac{1}{4(1-\nu_0)} \left\{ \frac{\rho^2}{2(\rho^2 - 1)} + \left[ 1 - 2\nu_0 - \frac{3}{4(\rho^2 - 1)} \right] g \right\} \\
 S_{1212} &= S_{1313} = \frac{1}{4(1-\nu_0)} \left\{ 1 - 2\nu_0 - \frac{\rho^2 + 1}{\rho^2 - 1} - \frac{1}{2} \left[ 1 - 2\nu_0 - \frac{3(\rho^2 + 1)}{\rho^2 - 1} \right] g \right\}
 \end{aligned}$$

where  $\rho$  is the aspect ratio of the filler ( $a_1/a_2 = a_1/a_3$ ) and  $\nu_0$  is the Poisson ratio of the matrix. Other components can be obtained using the minor symmetry condition ( $S_{ijkl} = S_{jikl} = S_{ijlk}$ ). Here,  $g$  is given by

$$\begin{aligned}
 g &= \frac{\rho}{(\rho^2 - 1)^{3/2}} \left\{ \rho(\rho^2 - 1)^{\frac{1}{2}} - \cosh^{-1} \rho \right\} && \text{prolate shape} \\
 &= \frac{\rho}{(1 - \rho^2)^{3/2}} \left\{ \cos^{-1} \rho - \rho(1 - \rho^2)^{\frac{1}{2}} \right\} && \text{oblate shape}
 \end{aligned}$$

## Appendix B: Effective inclusion method

In the effective inclusion method, a displacement jump due to interfacial damage is modeled by the reduced elastic modulus of the inclusion in the perfect bonding case. If this method is adapted, it becomes unnecessary to consider the modified Eshelby tensor or modified strain concentration tensor because interfacial damage is already considered by reducing the elastic modulus of the inclusion.

In the presence of an interfacial spring, the volume-averaged stress( $\bar{\sigma}$ ) and strain( $\bar{\epsilon}$ ) of the composite are expressed using the volume-averaged stress (strain) within the matrix  $\sigma_0(\epsilon_0)$  and particles  $\sigma_1(\epsilon_1)$ , as in Eq. (C1)

$$\begin{aligned}\bar{\sigma} &= c_0 \bar{\sigma}_0 + c_1 \bar{\sigma}_1 \\ \bar{\epsilon} &= c_0 \bar{\epsilon}_0 + c_1 \bar{\epsilon}_1 + \frac{1}{2V_1} \int_{S_1} (\Delta \mathbf{u} \otimes \mathbf{n} + \mathbf{n} \otimes \Delta \mathbf{u}) dS\end{aligned}\tag{C1}$$

Here,  $V_1$  and  $S_1$  are the total volume and surface of the particles in a composite, respectively. Under the assumption that local stress at the interface is uniform according to the mean stress of the inclusion, by replacing  $\Delta \mathbf{u}$  by Eq. (35), Eq. (C1) is reduced and can be expressed by Eq. (C2),

$$\begin{aligned}\bar{\epsilon} &= c_0 \bar{\epsilon}_0 + c_1 (\mathbf{I} + \mathbf{H} : \mathbf{L}_1) : \mathbf{L}_1^{-1} : \bar{\sigma}_1 \\ \text{where } H_{ijkl} &= \frac{1}{4V_1} \int_{S_1} (\eta_{ik} n_j n_l + \eta_{il} n_j n_k + \eta_{jk} n_i n_l + \eta_{jl} n_i n_k) dS\end{aligned}\tag{C2}$$

The term  $(\mathbf{I} + \mathbf{H} : \mathbf{L}_1) : \mathbf{L}_1^{-1}$  denotes the compliance of the effective inclusion. When the inclusion is spherical with the replacement of  $\boldsymbol{\eta}$  by Eq. (34), the reduced bulk and shear modulus  $(K_1^R, \mu_1^R)$  of the inclusion are obtained as shown below.

$$\begin{aligned}
K_1^R &= \frac{K_1 R}{3K_1 \beta + R} \\
\mu_1^R &= \frac{5\mu_1 R}{5R + 2\mu_1(3\alpha + 2\beta)}
\end{aligned}
\tag{C3}$$

After predicting the strain concentration tensor using the reduced elastic stiffness, we can obtain the effective modulus of the composite, which is expressed as Eq. (C4).

$$\begin{aligned}
\mathbf{L}_{\text{eff}} &= (c_0 \mathbf{L}_0 + c_1 \mathbf{L}_1^R : \mathbf{T}^R) : (c_0 \mathbf{I} + c_1 \mathbf{T}^R)^{-1}. \\
\text{where } \mathbf{T}^R &= [\mathbf{I} + \mathbf{S} : \mathbf{L}_0 : (\mathbf{L}_1^R - \mathbf{L}_0)]^{-1}
\end{aligned}
\tag{C4}$$

It should also be noted that when the effective inclusion method is adopted, a perfect bonding condition would be applied at the interface.
